# Supplementary material
Source: ML conference proceedings conference paper supplement (https://openreview.net/forum?id=r4BrtJRmy9)
Supplement: supplementary_material [file sensitivity_analysis.pdf › sensitivity_analysis.pdf]

# 1 Hyperparameter Sensitivity Analysis

This section details the hyperparameter sensitivity analysis conducted to evaluate the sensitivity of MIRI to various configuration settings.

## 1.1 Methodology

The sensitivity analysis was performed by systematically varying one hyperparameter at a time while keeping all other parameters fixed to a base configuration. This allows for the isolated assessment of each parameter’s impact on imputation performance. The study was conducted on three synthetic datasets generated using the methods described in the main text: Gaussian, Mixed (Gaussian and Uniform), and Uniform Correlated. Performance was evaluated using Root Mean Squared Error (RMSE), Mean Absolute Error (MAE), and Maximum Mean Discrepancy (MMD) between the imputed values and the ground truth for the initially missing entries. Lower values indicate better performance for all metrics.

## 1.2 Data Generation

The synthetic datasets used in this study consist of 1000 samples and 20 features. A missing rate of 20% was applied to each dataset. The data types include Gaussian, Uniform Correlated, and Mixed (Gaussian and Uniform) as follows:

- **Gaussian Data:** Multivariate normal distribution  $X \sim \mathcal{N}(\mathbf{0}, I)$  where features are independent standard normal variables  $X_i \sim \mathcal{N}(0, 1)$ .
- **Uniform Correlated Data:** Generated as  $X = UL^T$  where  $U \sim \text{Uniform}(0, 1)^{N \times D}$  and  $L$  is a lower triangular matrix derived from a predefined correlation structure, resulting in uniformly distributed but correlated features.
- **Mixed Data:** First  $\lfloor D/2 \rfloor$  features follow standard normal distributions, while the remaining features follow uniform distributions, creating a heterogeneous dataset with mixed distributions.

## 1.3 Base Configuration

The base configuration used for the sensitivity analysis is as follows:

- Hidden Dimensions: 1024x1024x1024
- Activation Function: SiLU
- Dropout Rate: 0.0
- Learning Rate:  $1 \times 10^{-4}$
- ODE Solver Steps: 1000
- Automatic Mixed Precision (AMP): False
- Optimizer: Adam
- Gradient Clipping Threshold: 1.0
- Reinitialize Network Per Round: False (i.e., network weights are retained across imputation rounds)

## 1.4 Results

Tables 1, 2, and 3 present the results for each dataset type. The ‘base config’ row indicates the performance with the default parameters listed above. Each subsequent row shows the result when the specified parameter is changed to the given value, holding all others constant.

Table 1: Sensitivity Analysis Results on Gaussian Synthetic Data

| Parameter                  | Value           | RMSE  | MAE   | MMD   |
|----------------------------|-----------------|-------|-------|-------|
| base config                | -               | 1.433 | 1.142 | 0.044 |
| activation                 | gelu            | 1.417 | 1.130 | 0.044 |
| activation                 | leaky_relu      | 1.418 | 1.133 | 0.044 |
| activation                 | relu            | 1.409 | 1.127 | 0.044 |
| activation                 | tanh            | 1.408 | 1.123 | 0.044 |
| amp                        | True            | 1.418 | 1.129 | 0.044 |
| dropout_rate               | 0.1             | 1.426 | 1.136 | 0.044 |
| dropout_rate               | 0.2             | 1.385 | 1.102 | 0.044 |
| gradient_clip              | 0.0             | 1.415 | 1.131 | 0.044 |
| gradient_clip              | 0.5             | 1.408 | 1.124 | 0.044 |
| gradient_clip              | 1.5             | 1.414 | 1.124 | 0.044 |
| gradient_clip              | 2.0             | 1.422 | 1.135 | 0.044 |
| gradient_clip              | 5.0             | 1.413 | 1.126 | 0.044 |
| hidden_dims                | 1024            | 1.419 | 1.137 | 0.044 |
| hidden_dims                | 1024x1024       | 1.426 | 1.138 | 0.044 |
| hidden_dims                | 1024x512x1024   | 1.411 | 1.124 | 0.044 |
| hidden_dims                | 2048x1024x512   | 1.434 | 1.142 | 0.044 |
| hidden_dims                | 2048x2048       | 1.448 | 1.151 | 0.044 |
| hidden_dims                | 256x256x256x256 | 1.415 | 1.129 | 0.044 |
| hidden_dims                | 4096            | 1.449 | 1.143 | 0.044 |
| hidden_dims                | 512x1024x2048   | 1.422 | 1.133 | 0.044 |
| hidden_dims                | 512x512         | 1.455 | 1.158 | 0.044 |
| hidden_dims                | 512x512x512x512 | 1.418 | 1.129 | 0.044 |
| learning_rate              | 1e-02           | 1.389 | 1.112 | 0.044 |
| learning_rate              | 1e-03           | 1.412 | 1.121 | 0.044 |
| learning_rate              | 1e-05           | 1.411 | 1.125 | 0.044 |
| learning_rate              | 5e-03           | 1.406 | 1.120 | 0.044 |
| learning_rate              | 5e-04           | 1.405 | 1.118 | 0.044 |
| learning_rate              | 5e-05           | 1.422 | 1.133 | 0.044 |
| ode_steps                  | 50              | 1.414 | 1.126 | 0.044 |
| ode_steps                  | 100             | 1.416 | 1.127 | 0.044 |
| ode_steps                  | 250             | 1.402 | 1.118 | 0.044 |
| ode_steps                  | 500             | 1.400 | 1.112 | 0.044 |
| ode_steps                  | 750             | 1.404 | 1.119 | 0.044 |
| ode_steps                  | 1500            | 1.424 | 1.137 | 0.044 |
| optimizer                  | adagrad         | 1.681 | 1.336 | 0.044 |
| optimizer                  | adamw           | 1.410 | 1.125 | 0.044 |
| optimizer                  | rmsprop         | 1.405 | 1.120 | 0.044 |
| optimizer                  | sgd             | 1.408 | 1.121 | 0.044 |
| reinitialize_net_per_round | True            | 1.489 | 1.192 | 0.044 |

### 1.4.1 Gaussian Data

**Analysis:** The model demonstrates robustness to most hyperparameter changes on the Gaussian dataset.

- **Activation:** ReLU and Tanh slightly outperform the base SiLU, while GELU and Leaky ReLU perform similarly.
- **Dropout:** A higher dropout rate (0.2) surprisingly improves performance, suggesting potential overfitting in the base model for this dataset.
- **Learning Rate:** Rates around  $5 \times 10^{-4}$  to  $1 \times 10^{-3}$  show slight improvements. Very high ( $1 \times 10^{-2}$ ) or very low ( $1 \times 10^{-5}$ ) rates maintain reasonable performance, though  $1 \times 10^{-2}$  is slightly better than base.
- **ODE Steps:** Fewer steps (250-500) seem slightly beneficial compared to the base 1000 steps.
- **Optimizer:** Adam/AdamW, RMSprop, and SGD perform similarly well and slightly better than the base Adam. Adagrad performs noticeably worse.
- **Hidden Dimensions:** Performance is relatively stable across different architectures, except for very small networks (excluded) or very large single-layer networks (4096). Deeper networks (e.g., 4 layers of 512) perform well.
- **Other:** AMP has minimal impact. Reinitializing the network each round degrades performance. Gradient clipping values between 0.5 and 1.5 yield slight improvements over the base 1.0 or no clipping (0.0).

### 1.4.2 Mixed Data

**Analysis:** The mixed dataset shows more sensitivity, particularly to learning rate and optimizer choice.

- **Activation:** GELU performs slightly better than the base SiLU. Leaky ReLU, ReLU, and Tanh perform slightly worse.
- **Learning Rate:** This parameter has a significant impact. The base rate ( $1 \times 10^{-4}$ ) and lower rates ( $1 \times 10^{-5}$ ,  $5 \times 10^{-5}$ ) perform well. Rates of  $5 \times 10^{-4}$  and higher lead to substantially worse performance, especially  $1 \times 10^{-2}$  and  $5 \times 10^{-3}$ , which drastically increase all error metrics.
- **Optimizer:** Adam/AdamW and RMSprop perform well, close to the base Adam. SGD and Adagrad result in significantly higher errors.
- **Hidden Dimensions:** Larger networks (e.g., 2048x2048, 4096) and specific architectures (2048x1024x512) show improvements over the base 1024x1024x1024. Smaller networks like 512x512 perform worse.
- **Other:** Performance is less sensitive to activation, dropout, ODE steps, AMP, gradient clipping (0.5 slightly better), and reinitialization (True is slightly worse). Dropout shows less benefit than in the Gaussian case.

Table 2: Sensitivity Analysis Results on Mixed Synthetic Data

| Parameter                  | Value           | RMSE  | MAE   | MMD   |
|----------------------------|-----------------|-------|-------|-------|
| base config                | -               | 1.040 | 0.734 | 0.042 |
| activation                 | gelu            | 1.036 | 0.724 | 0.042 |
| activation                 | leaky_relu      | 1.044 | 0.731 | 0.042 |
| activation                 | relu            | 1.051 | 0.739 | 0.042 |
| activation                 | tanh            | 1.055 | 0.739 | 0.042 |
| amp                        | True            | 1.045 | 0.730 | 0.042 |
| dropout_rate               | 0.1             | 1.069 | 0.745 | 0.042 |
| dropout_rate               | 0.2             | 1.048 | 0.729 | 0.042 |
| gradient_clip              | 0.0             | 1.053 | 0.735 | 0.042 |
| gradient_clip              | 0.5             | 1.032 | 0.727 | 0.042 |
| gradient_clip              | 1.5             | 1.048 | 0.741 | 0.042 |
| gradient_clip              | 2.0             | 1.044 | 0.732 | 0.042 |
| gradient_clip              | 5.0             | 1.051 | 0.737 | 0.042 |
| hidden_dims                | 1024            | 1.049 | 0.737 | 0.042 |
| hidden_dims                | 1024x1024       | 1.045 | 0.735 | 0.042 |
| hidden_dims                | 1024x512x1024   | 1.045 | 0.729 | 0.042 |
| hidden_dims                | 2048x1024x512   | 1.029 | 0.725 | 0.042 |
| hidden_dims                | 2048x2048       | 1.018 | 0.716 | 0.042 |
| hidden_dims                | 256x256x256x256 | 1.059 | 0.741 | 0.042 |
| hidden_dims                | 4096            | 1.023 | 0.716 | 0.042 |
| hidden_dims                | 512x1024x2048   | 1.046 | 0.737 | 0.043 |
| hidden_dims                | 512x512         | 1.066 | 0.748 | 0.042 |
| hidden_dims                | 512x512x512x512 | 1.034 | 0.727 | 0.042 |
| learning_rate              | 1e-02           | 1.281 | 1.020 | 0.053 |
| learning_rate              | 1e-03           | 1.052 | 0.740 | 0.042 |
| learning_rate              | 1e-05           | 1.019 | 0.721 | 0.042 |
| learning_rate              | 5e-03           | 1.298 | 1.029 | 0.054 |
| learning_rate              | 5e-04           | 1.115 | 0.829 | 0.045 |
| learning_rate              | 5e-05           | 1.043 | 0.732 | 0.042 |
| ode_steps                  | 50              | 1.042 | 0.732 | 0.042 |
| ode_steps                  | 100             | 1.037 | 0.724 | 0.042 |
| ode_steps                  | 250             | 1.038 | 0.731 | 0.042 |
| ode_steps                  | 500             | 1.049 | 0.733 | 0.042 |
| ode_steps                  | 750             | 1.058 | 0.741 | 0.042 |
| ode_steps                  | 1500            | 1.049 | 0.738 | 0.042 |
| optimizer                  | adagrad         | 1.248 | 0.936 | 0.048 |
| optimizer                  | adamw           | 1.042 | 0.736 | 0.042 |
| optimizer                  | rmsprop         | 1.036 | 0.730 | 0.042 |
| optimizer                  | sgd             | 1.238 | 0.977 | 0.052 |
| reinitialize_net_per_round | True            | 1.073 | 0.740 | 0.043 |

### 1.4.3 Uniform Correlated Data

**Analysis:** Similar to the mixed data, this dataset shows high sensitivity to learning rate and optimizer. MMD values are generally higher than for Gaussian or Mixed data.

- **Activation:** Leaky ReLU provides the best performance, notably improving MMD compared to the base SiLU. Other activations perform similarly to or slightly worse than the base.
- **Learning Rate:** Extremely sensitive. Only the base rate ( $1 \times 10^{-4}$ ) and nearby lower rates ( $5 \times 10^{-5}$ ,  $1 \times 10^{-5}$ ) or slightly higher ( $5 \times 10^{-4}$ ) maintain good performance. Rates of  $1 \times 10^{-3}$  and above cause a dramatic increase in all error metrics, especially MMD.
- **Optimizer:** Adam/AdamW perform best. RMSprop is slightly worse. SGD and Adagrad lead to very poor results, particularly in MMD.
- **Dropout:** A rate of 0.2 slightly improves RMSE/MAE and maintains MMD, similar to the Gaussian case.
- **Hidden Dimensions:** A large single layer (4096) performs slightly better than the base. Most other architectures perform similarly or slightly worse.
- **Other:** Performance is relatively insensitive to ODE steps, AMP, gradient clipping, and reinitialization.

## 1.5 Overall Conclusions

The sensitivity analysis highlights that the model is generally robust, but performance, especially on non-Gaussian or mixed-type data, is highly sensitive to the learning rate and optimizer choice. The base configuration with Adam optimizer and a learning rate of  $1 \times 10^{-4}$  provides a strong starting point. However, for specific data types, adjustments might be beneficial:

- Leaky ReLU activation seems promising for uniform-like data.
- Careful tuning of the learning rate is crucial, especially avoiding rates above  $5 \times 10^{-4}$  for non-Gaussian data.
- Adam/AdamW consistently perform well across datasets, while SGD and Adagrad struggle with more complex distributions.
- Moderate dropout (e.g., 0.2) might be beneficial, potentially dataset-dependent.
- Network architecture variations generally have a smaller impact than learning rate or optimizer, provided the network is sufficiently large.

## 2 CIFAR-10 Sensitivity Analysis

### 2.1 Experimental Setup

CIFAR-10 images ( $32 \times 32 \times 3$ ) with 40% Missing Completely At Random (MCAR) were used. To balance computational cost, a subset of 2000 images from the standard CIFAR-10 test set was used for evaluation; this constitutes a potential limitation of the study. We vary activation (SiLU, ReLU, LeakyReLU, Tanh), learning rates ( $1 \times 10^{-3}$ ,  $1 \times 10^{-4}$ ,  $1 \times 10^{-6}$ ), and optimizers (Adam, Adagrad). Evaluation metrics:

- FID (Fréchet Inception Distance, lower is better)
- PSNR (Peak Signal-to-Noise Ratio in dB, higher is better)
- SSIM (Structural Similarity Index, higher is better)

Table 3: Sensitivity Analysis Results on Uniform Correlated Synthetic Data

| Parameter                  | Value           | RMSE  | MAE   | MMD   |
|----------------------------|-----------------|-------|-------|-------|
| base config                | -               | 0.404 | 0.326 | 0.105 |
| activation                 | gelu            | 0.409 | 0.329 | 0.106 |
| activation                 | leaky_relu      | 0.400 | 0.322 | 0.100 |
| activation                 | relu            | 0.408 | 0.328 | 0.104 |
| activation                 | tanh            | 0.407 | 0.328 | 0.104 |
| amp                        | True            | 0.407 | 0.330 | 0.108 |
| dropout_rate               | 0.1             | 0.414 | 0.332 | 0.108 |
| dropout_rate               | 0.2             | 0.400 | 0.322 | 0.105 |
| gradient_clip              | 0.0             | 0.406 | 0.327 | 0.105 |
| gradient_clip              | 0.5             | 0.410 | 0.332 | 0.103 |
| gradient_clip              | 1.5             | 0.407 | 0.327 | 0.104 |
| gradient_clip              | 2.0             | 0.407 | 0.329 | 0.108 |
| gradient_clip              | 5.0             | 0.413 | 0.333 | 0.107 |
| hidden_dims                | 1024            | 0.410 | 0.331 | 0.108 |
| hidden_dims                | 1024x1024       | 0.413 | 0.333 | 0.109 |
| hidden_dims                | 1024x512x1024   | 0.406 | 0.329 | 0.105 |
| hidden_dims                | 2048x1024x512   | 0.411 | 0.329 | 0.109 |
| hidden_dims                | 2048x2048       | 0.407 | 0.327 | 0.107 |
| hidden_dims                | 256x256x256x256 | 0.409 | 0.329 | 0.105 |
| hidden_dims                | 4096            | 0.401 | 0.325 | 0.103 |
| hidden_dims                | 512x1024x2048   | 0.409 | 0.330 | 0.107 |
| hidden_dims                | 512x512         | 0.413 | 0.332 | 0.108 |
| hidden_dims                | 512x512x512x512 | 0.406 | 0.328 | 0.107 |
| learning_rate              | 1e-02           | 1.080 | 0.856 | 0.479 |
| learning_rate              | 1e-03           | 1.044 | 0.724 | 0.431 |
| learning_rate              | 1e-05           | 0.409 | 0.331 | 0.108 |
| learning_rate              | 5e-03           | 1.591 | 1.325 | 0.520 |
| learning_rate              | 5e-04           | 0.410 | 0.331 | 0.107 |
| learning_rate              | 5e-05           | 0.409 | 0.331 | 0.109 |
| ode_steps                  | 50              | 0.412 | 0.333 | 0.109 |
| ode_steps                  | 100             | 0.407 | 0.328 | 0.103 |
| ode_steps                  | 250             | 0.413 | 0.335 | 0.108 |
| ode_steps                  | 500             | 0.412 | 0.332 | 0.106 |
| ode_steps                  | 750             | 0.407 | 0.328 | 0.105 |
| ode_steps                  | 1500            | 0.409 | 0.329 | 0.109 |
| optimizer                  | adagrad         | 1.166 | 0.809 | 0.425 |
| optimizer                  | adamw           | 0.408 | 0.329 | 0.104 |
| optimizer                  | rmsprop         | 0.411 | 0.332 | 0.109 |
| optimizer                  | sgd             | 1.330 | 1.054 | 0.503 |
| reinitialize_net_per_round | True            | 0.412 | 0.332 | 0.105 |

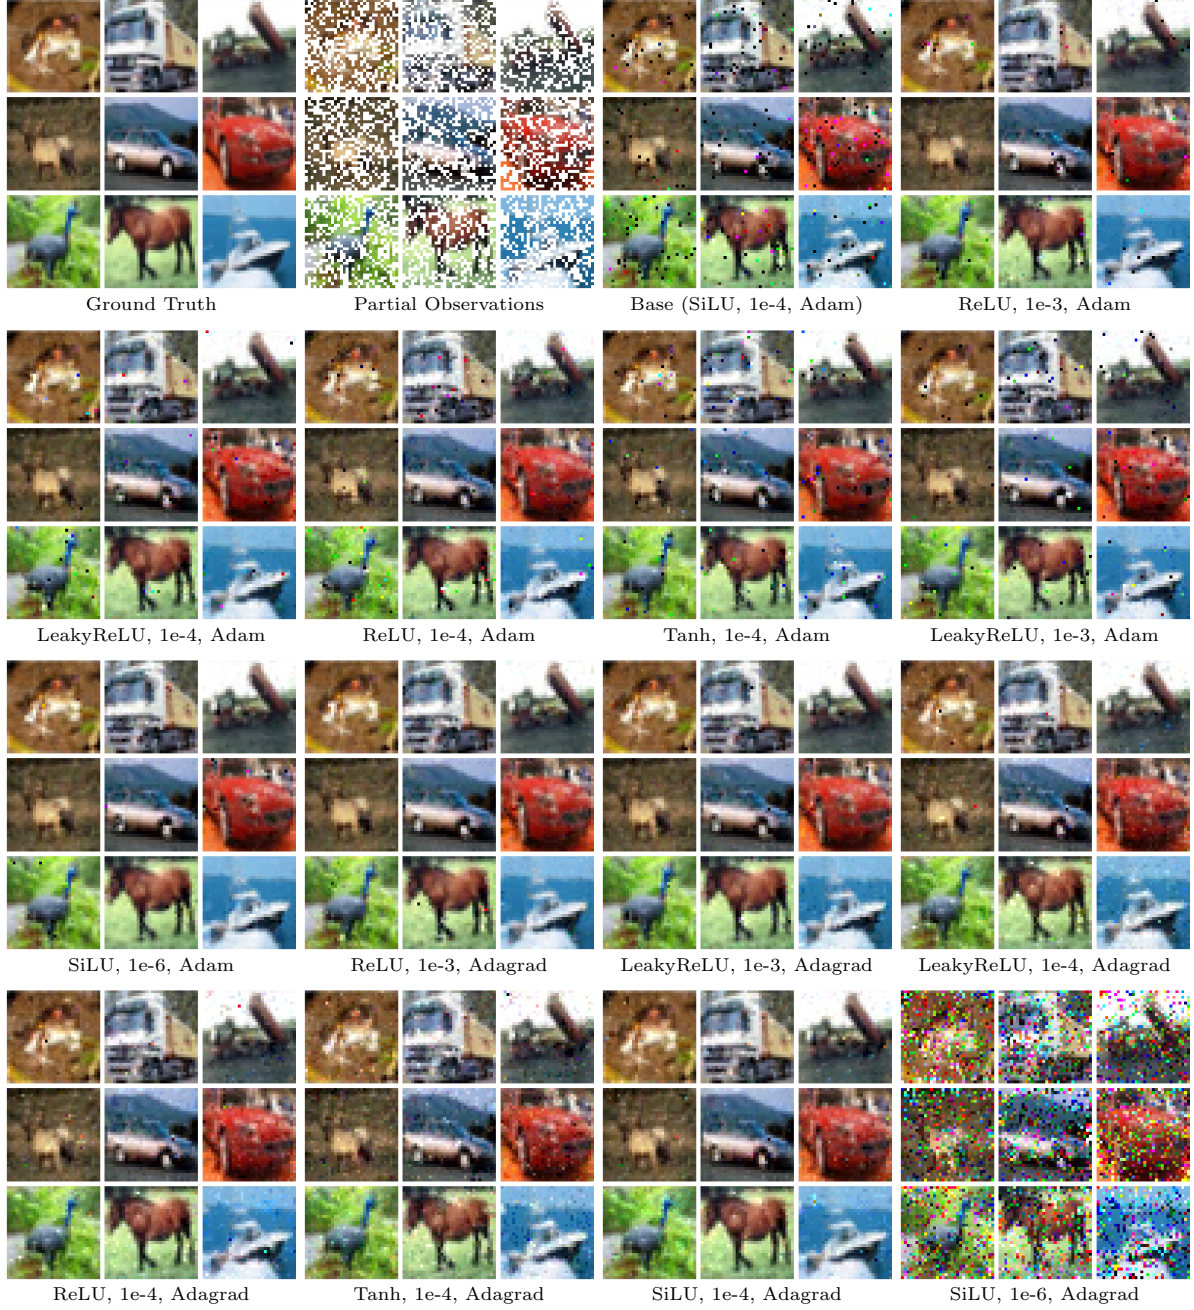

Figure 1: Sample CIFAR-10 images (9 samples per grid). Visual examples are shown for several configurations, including Ground Truth, Partial Observations, Base (SiLU, 1e-4, Adam), and other variants with 40% of missingness.



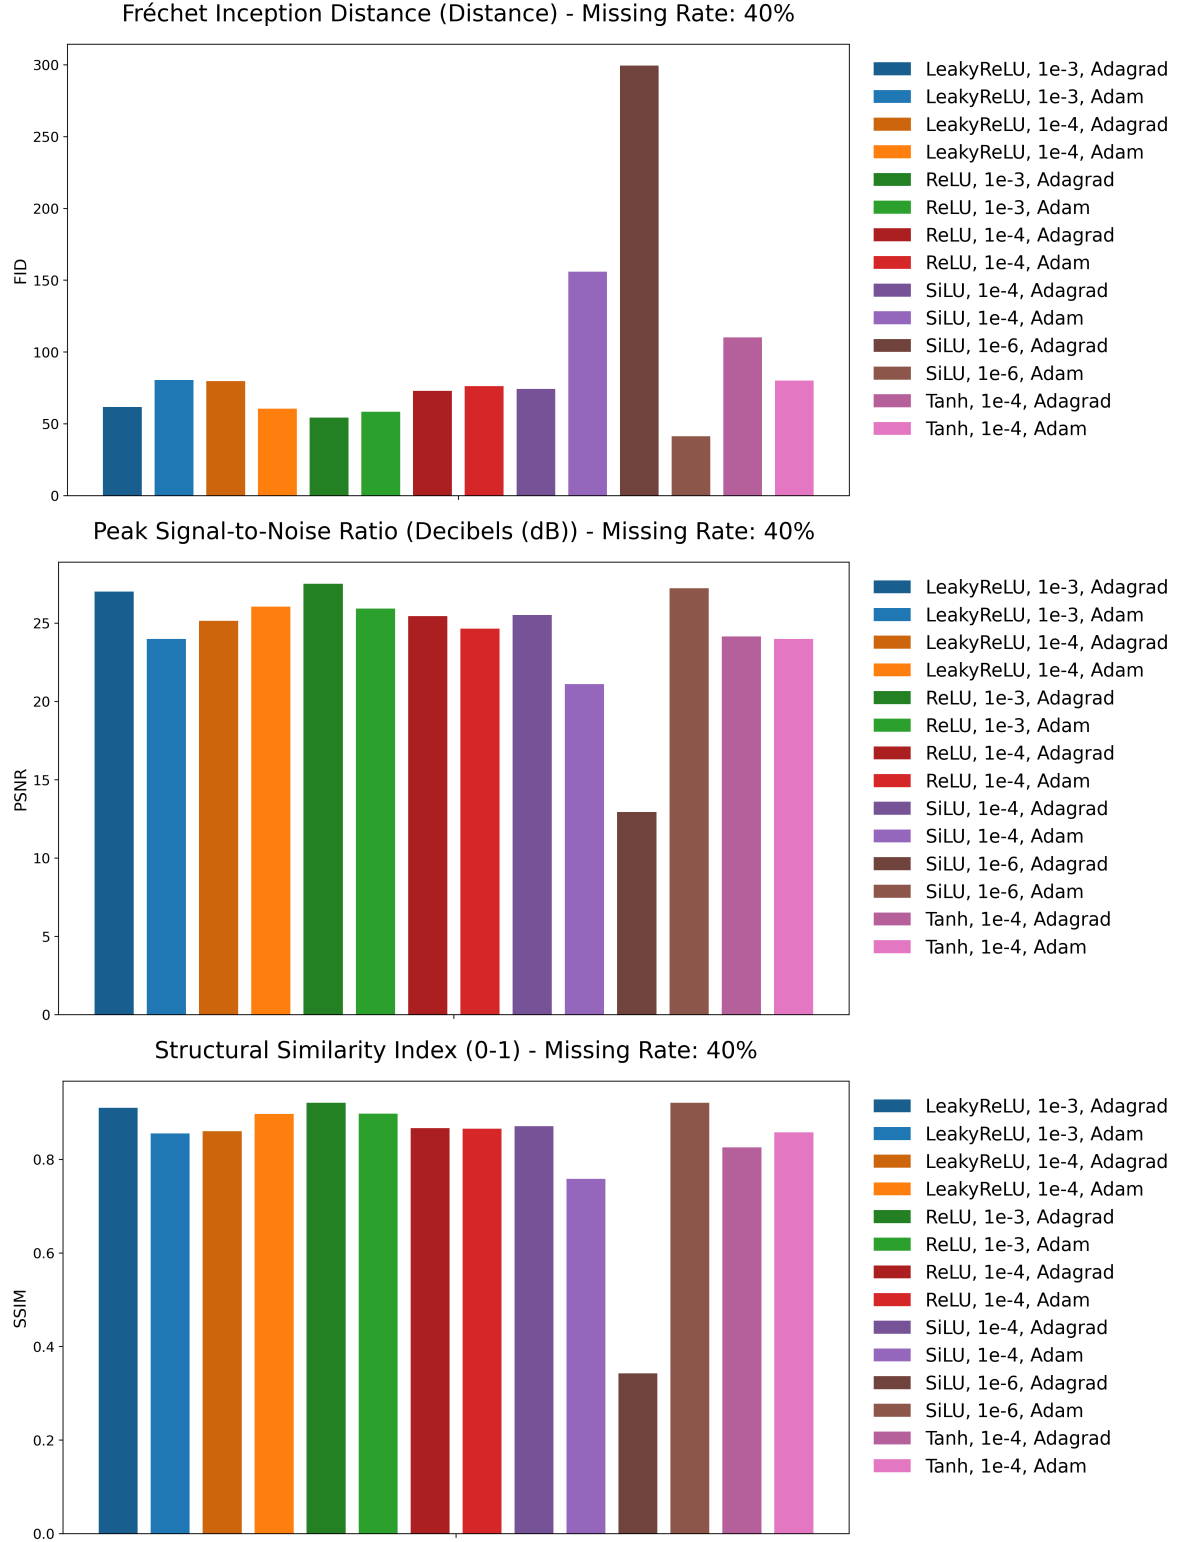

Figure 2: Imputation metrics for CIFAR-10 at 40% of missingness: (top) FID, (middle) PSNR and (bottom) SSIM.

Table 4: Imputation performance on CIFAR-10 at 40% missingness across 11 hyperparameter variants.

| Configuration       | FID ↓    | PSNR ↑  | SSIM ↑ |
|---------------------|----------|---------|--------|
| SiLU, 1e-6, Adam    | 41.3386  | 27.2229 | 0.9207 |
| ReLU, 1e-3, Adagrad | 54.2558  | 27.5151 | 0.9211 |
| ReLU, 1e-3, Adam    | 58.2959  | 25.9304 | 0.8979 |
| LeakyReLU, Adam     | 70.5850  | 25.5446 | 0.8808 |
| ReLU, 1e-4, Adagrad | 72.9518  | 25.4514 | 0.8668 |
| SiLU, 1e-4, Adagrad | 74.2793  | 25.5197 | 0.8706 |
| ReLU, 1e-4, Adam    | 76.2365  | 24.6423 | 0.8656 |
| Tanh, 1e-4, Adam    | 80.1353  | 23.9803 | 0.8579 |
| Tanh, 1e-4, Adagrad | 110.1267 | 24.1390 | 0.8257 |
| SiLU, 1e-4, Adam    | 155.8566 | 21.1063 | 0.7582 |
| SiLU, 1e-6, Adagrad | 299.3573 | 12.9417 | 0.3423 |

## 2.2 Results and Analysis

The quantitative results of the CIFAR-10 sensitivity analysis are presented in Table 4. Visual comparisons of imputed samples for all configurations are shown in Figure 1.

Key observations are:

- **Optimizer Impact:** The choice of optimizer is critical, with performance varying between Adam and Adagrad. The (SiLU, 1e-6, Adam) configuration achieved the best FID (41.34). Notably, (ReLU, 1e-3, Adagrad) secured the second-best FID (54.26) and the top PSNR (27.52) and SSIM (0.9211) scores overall. The worst-performing configuration across all metrics remains (SiLU, 1e-6, Adagrad) with an FID of 299.36, indicating a failure to learn meaningful imputations. Out of the 11 configurations, 6 use Adam and 5 use Adagrad. The top 5 configurations by FID include 3 Adam and 2 Adagrad variants, suggesting Adagrad can be competitive with appropriate settings.
- **Activation Function (with Adam):**
  - **SiLU with LR 1e-6:** Achieved the best FID (41.34) and excellent PSNR (27.22, 2nd) and SSIM (0.9207, 2nd).
  - **ReLU with LR 1e-3:** Strong performer with 3rd best FID (58.30), PSNR (25.93), and SSIM (0.8979).
  - **LeakyReLU (unspecified LR in table, assumed 1e-3 or 1e-4):** Good FID (70.59, 4th), PSNR (25.54), and SSIM (0.8808).
  - **ReLU with LR 1e-4:** FID of 76.24 (7th), PSNR (24.64), SSIM (0.8656).
  - **Tanh with LR 1e-4:** FID of 80.14 (8th), PSNR (23.98), SSIM (0.8579).
  - **SiLU with LR 1e-4 (Base):** Poorest Adam performer in this set (FID 155.86, 10th), PSNR (21.11), SSIM (0.7582).
- **Activation Function (with Adagrad):**
  - **ReLU with LR 1e-3:** Exceptional performance, achieving the best PSNR (27.52) and SSIM (0.9211) overall, and the 2nd best FID (54.26).
  - **ReLU with LR 1e-4:** Good FID (72.95, 5th), PSNR (25.45), SSIM (0.8668).
  - **SiLU with LR 1e-4:** Competitive FID (74.28, 6th), PSNR (25.52), SSIM (0.8706).
  - **Tanh with LR 1e-4:** Moderate FID (110.13, 9th), PSNR (24.14), SSIM (0.8257).
  - **SiLU with LR 1e-6:** Worst performer overall (FID 299.36, 11th).
- **Learning Rate Sensitivity:** Performance is highly sensitive to learning rates for both optimizers. With Adam, a very low LR of 1e-6 (for SiLU) yielded the best FID, while 1e-3 (for ReLU) was also strong. The base LR of 1e-4 (for SiLU) was suboptimal among Adam variants. With Adagrad, LR 1e-3 (for ReLU) was optimal for PSNR/SSIM and very good for FID. The 1e-6 LR (for SiLU with Adagrad) was detrimental.

In summary, for CIFAR-10 imputation at 40% missingness, the interplay of optimizer, activation function, and learning rate is crucial and leads to varied outcomes. The (SiLU, 1e-6, Adam) configuration provided the best FID score (41.34), indicating high similarity in feature distributions. However, the (ReLU, 1e-3, Adagrad) configuration achieved the highest PSNR (27.52) and SSIM (0.9211) scores, suggesting better pixel-level accuracy and structural similarity, alongside a very competitive FID (54.26). The base configuration (SiLU, 1e-4, Adam) was significantly outperformed by several other variants. The (SiLU, 1e-6, Adagrad) combination performed very poorly across all metrics, indicating the risk of specific hyperparameter combinations.
